# Supplementary material
Source: publisher figshare collection journal article supplement (https://sage.figshare.com/ndownloader/files/23134154)
Supplement: Supplementary file 1 [file 23134154]

**The Attitude of Infectious Diseases Physicians in Turkey About Pre-Exposure Prophylaxis (PrEP):  
Results of an Online Survey**

1. What is your age?
  - a. 24-30
  - b. 31-40
  - c. 41-50
  - d. >50
2. What is your gender?
  - a. Female
  - b. Male
  - c. Non-binary
3. Are you a trainee or a specialist?
  - a. Trainee
  - b. Specialist
4. Which year of working are you in?
  - a. 0-1
  - b. 2-3
  - c. 3-5
  - d. >5
5. Which type of institution do you primarily work in?
  - a. University hospital
  - b. Education and Research hospital
  - c. Public (State) hospital
  - d. Private hospital
  - e. Private University hospital
6. Do you follow up HIV-positive individuals at your institute?
  - a. Yes
  - b. No
7. How many HIV-positive individuals do you follow-up at your institute?
  - a. 0
  - b. 0-10
  - c. 11-20
  - d. 21-30
  - e. >30

8. How would you rate your self-knowledge about PrEP?
  - a. Bad
  - b. Good
  - c. Very good
  - d. Excellent
9. Where have you got the knowledge about PrEP? (more than one option is acceptable)
  - a. Courses and conferences
  - b. Guidelines (CDC, BHIVA)
  - c. Scientific-based news
  - d. Social media
10. Which of the following groups is suitable for Pre-exposure prophylaxis (PrEP)? (more than one option is acceptable)
  - a. Sexually-active adult MSM (men who have sex with men) at substantial risk of HIV acquisition
  - b. Adult heterosexually active men and women who are at substantial risk of HIV acquisition
  - c. Adult persons who inject drugs (PWID) at substantial risk at HIV acquisition
  - d. Heterosexually active men and women whose partners are known to have HIV infection (HIV-discordant couples) during conception
  - e. Heterosexually active men and women whose partners are known to have HIV infection (HIV-discordant couples) during pregnancy
11. Did anyone ever request pre-exposure prophylaxis (PrEP)?
  - a. Yes
  - b. No
12. Did you ever recommend someone pre-exposure prophylaxis (PrEP)?
  - a. Yes
  - b. No
13. If pre-exposure prophylaxis drug supply was paid for and secured by the Ministry of Health, would you recommend it to persons who are at high risk of HIV acquisition?
  - a. Yes
  - b. No
  - c. I am not sure
14. If you answered "no" or "I am not sure" to question 11, why? (more than one option is acceptable)
  - a. I don't think this is the ideal method to protect people against HIV
  - b. I don't think that this is a cost-effective method
  - c. I think this method will increase the rate of sexually transmitted diseases

- d. I think it is a waste of time and energy to follow-up of these people who are not sick
  - e. Other issues (please specify)
15. If you answered “yes” to question 11, to which of these groups would you recommend it?  
(more than one option is acceptable)
- a. Sexually-active adult MSM (men who have sex with men) at substantial risk of HIV acquisition
  - b. Adult heterosexually active men and women who are at substantial risk of HIV acquisition
  - c. Adult persons who inject drugs (PWID) at substantial risk at HIV acquisition
  - d. Heterosexually active men and women whose partners are known to have HIV infection (HIV-discordant couples) during conception
  - e. Heterosexually active men and women whose partners are known to have HIV infection (HIV-discordant couples) during pregnancy
  - f. Adults diagnosed with sexually transmitted diseases
16. Do you find pre-exposure prophylaxis efficient?
- a. Yes
  - b. No
17. Do you find pre-exposure prophylaxis safe in terms of drug side effects?
- a. Yes
  - b. No
18. What do you think about the impact of pre-exposure prophylaxis on potential risk behaviours?
- a. Affects positively
  - b. Affects negatively
  - c. No effect
19. Do you think that we need a national guideline about pr-exposure prophylaxis?
- a. Yes
  - b. No
20. Would you support that pre-exposure prophylaxis drug supply to be paid for and secured by the Ministry of Health?
- a. Yes
  - b. No
  - c. I am not sure
